# Supplementary material for: Study of Optimal Perimetric Testing in Children (OPTIC): Feasibility, Reliability and Repeatability of Perimetry in Children
Source: PubMed Central journal article supplement (PMC4474916; doi:10.1371/journal.pone.0130895), 2015-06-19
Supplement: pone.0130895.s001.pdf [file pone.0130895.s001.pdf]

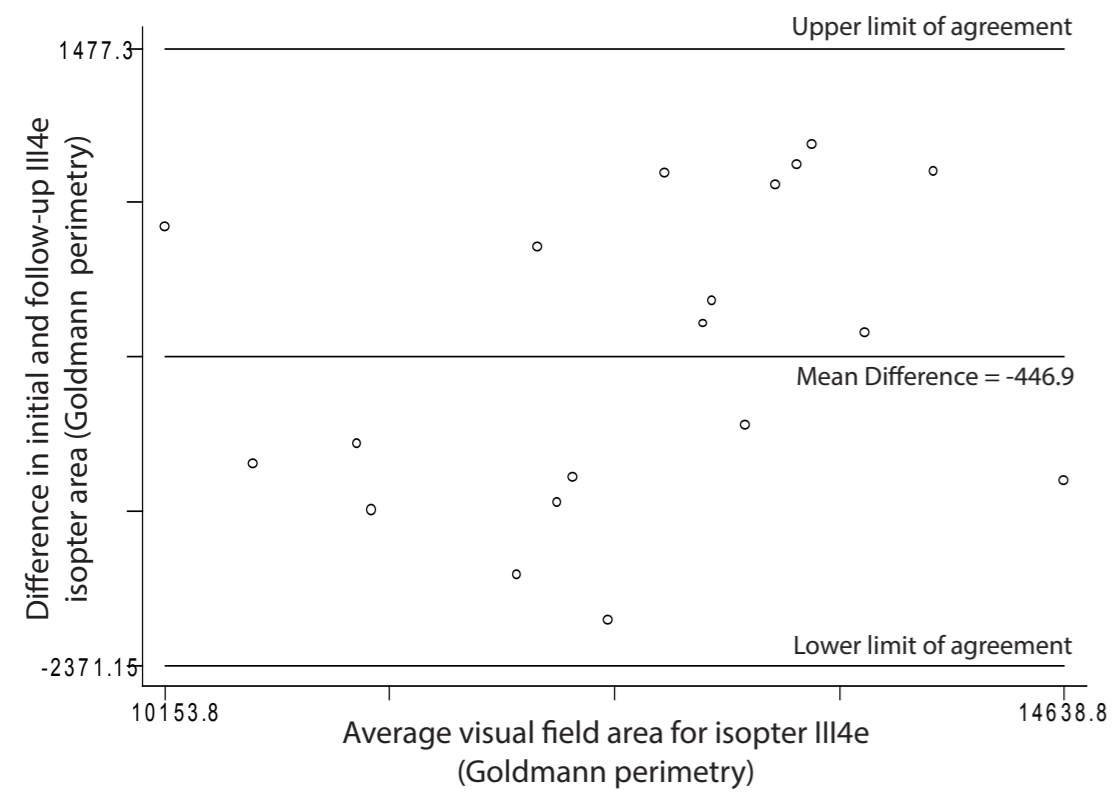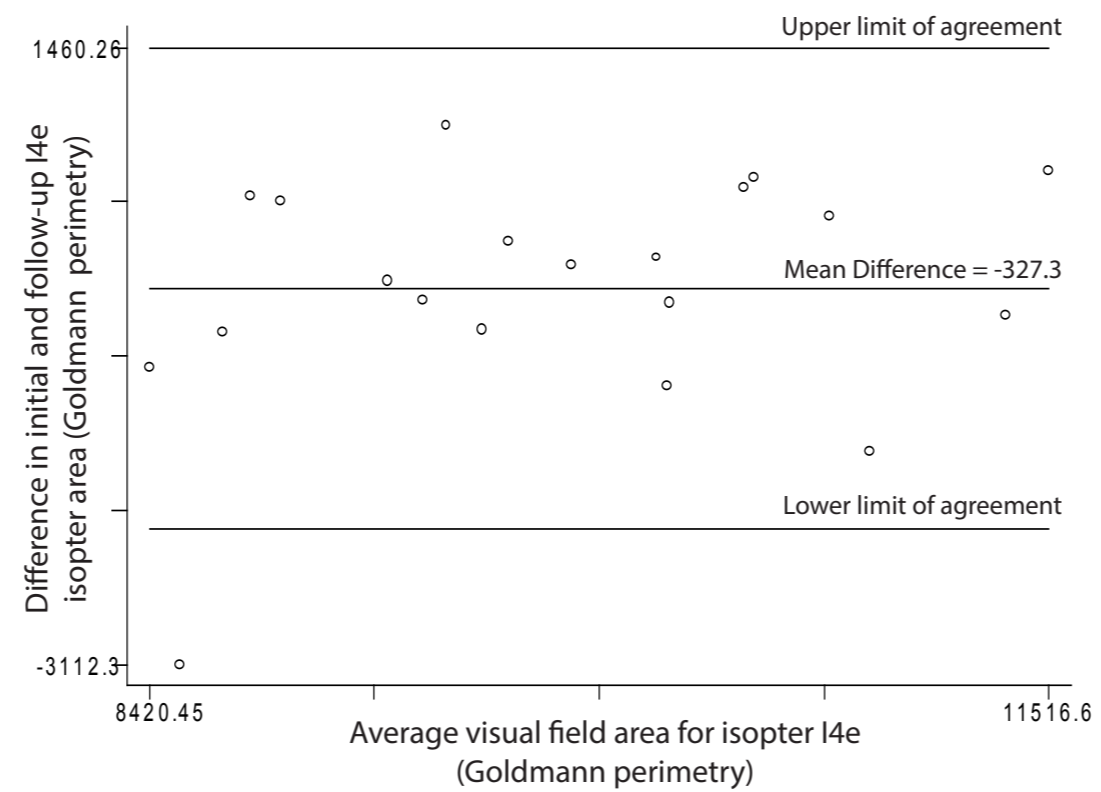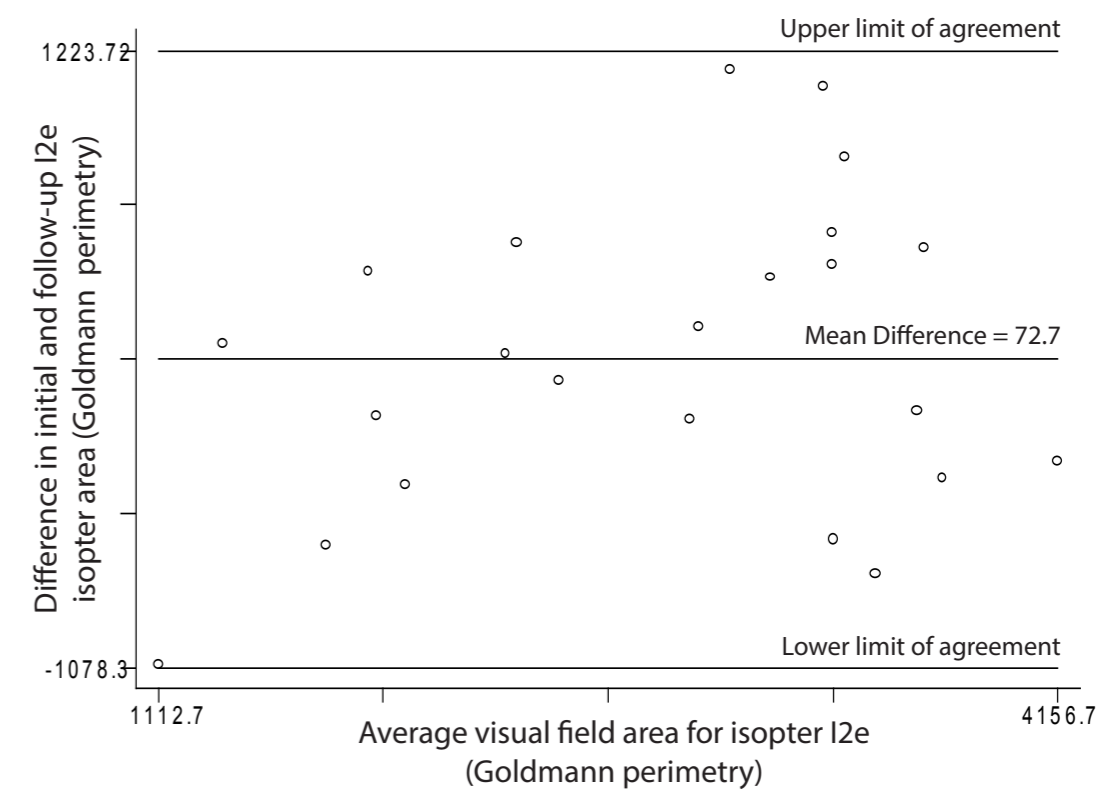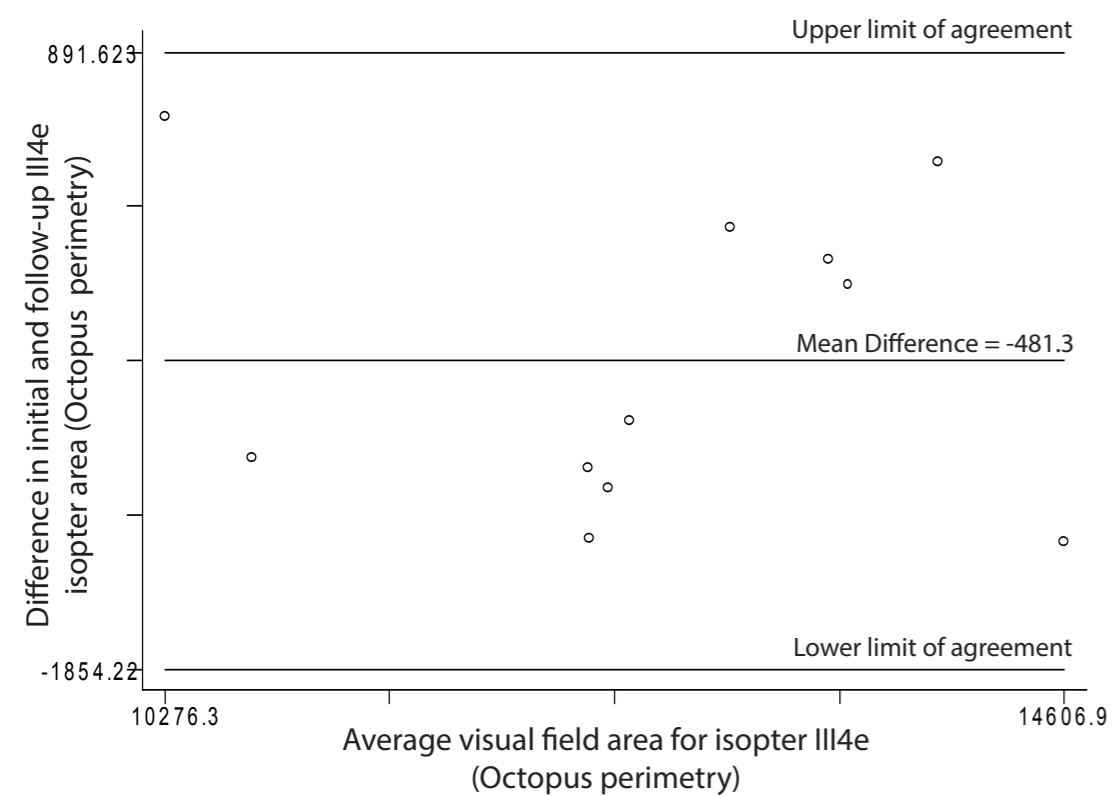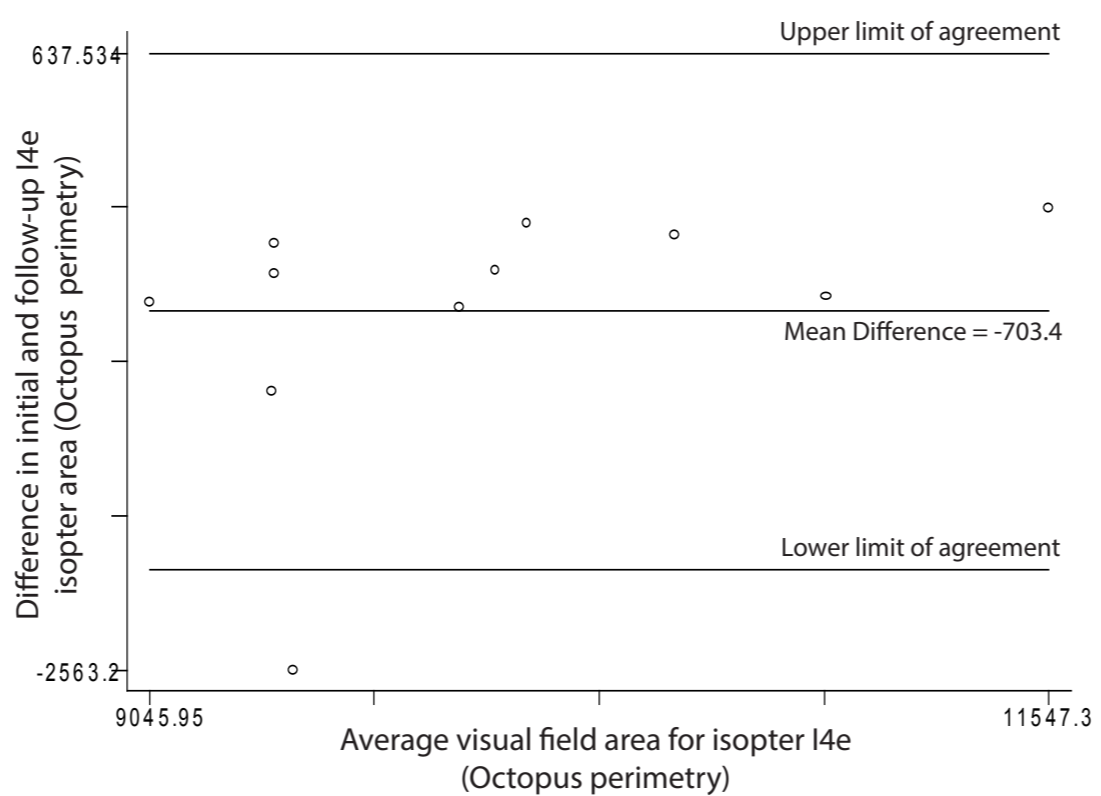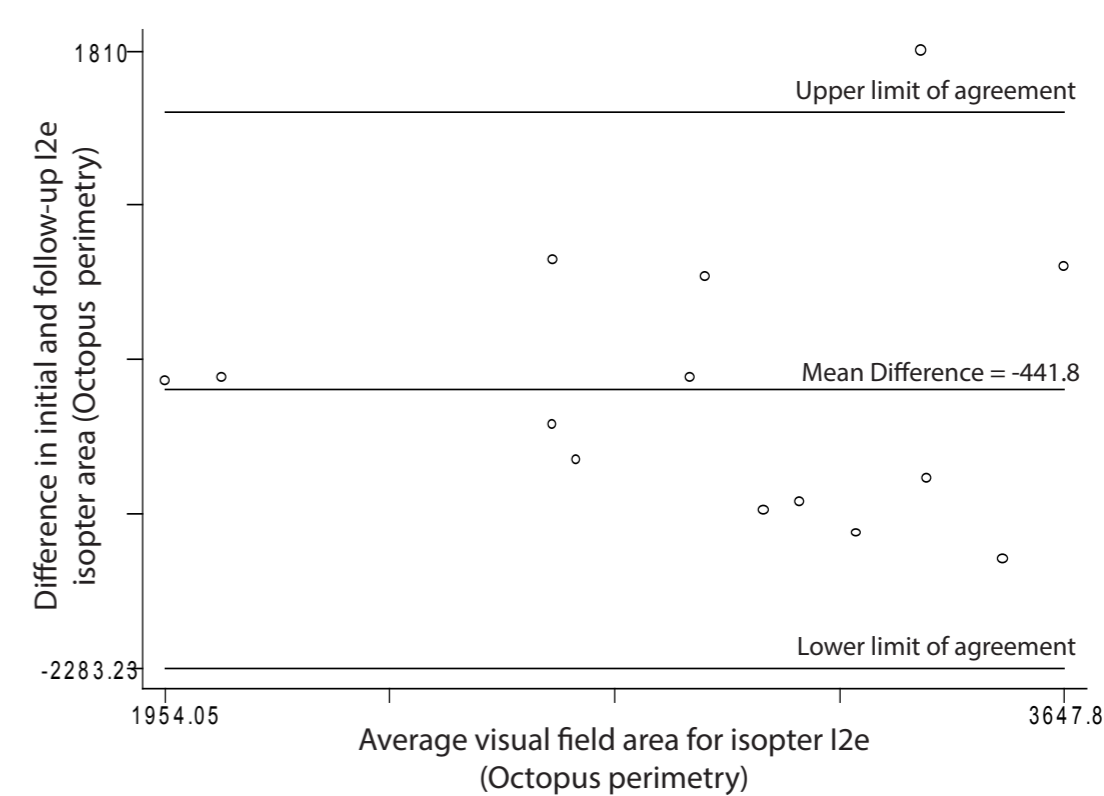

**Supporting Information, Figure 1.** Bland-Altman plots of initial vs. follow-up visual field area for all isopters using Goldmann and Octopus perimetry
